# Supplementary material
Source: HighWire-hosted journal article supplement (https://bjgp.org/highwire/filestream/42126/field_highwire_adjunct_files/0/BJGP.2020.1093.pdf)
Supplement: BJGP.2020.1093.pdf [file BJGP.2020.1093.pdf]

**Table S1.** Costs applied in the cost-effectiveness analysis

| <b>Types of costs</b>     | <b>Costs (€)</b> |
|---------------------------|------------------|
| <b>Health care costs</b>  |                  |
| General practitioner      | 33.76 per visit  |
| Out-of-hours primary care | 110.50 per visit |
| Referral to pediatrician  | 103.34 per visit |
| Hospital admission        | 487.02 per day   |
| Oral rehydration solution | 0.18 per 25 mL   |
| <b>Indirect costs</b>     |                  |
| Work absence of mother    | 35.50 per day    |
| Work absence of father    | 35.50 per day    |
